# Supplementary material for: Using the Mechanical Bond to Tune the Performance of a Thermally Activated Delayed Fluorescence Emitter
Source: PubMed Central journal article supplement (PMC8251797; doi:10.1002/anie.202101870), 2021-05-03

# checkCIF/PLATON report

You have not supplied any structure factors. As a result the full set of tests cannot be run.

THIS REPORT IS FOR GUIDANCE ONLY. IF USED AS PART OF A REVIEW PROCEDURE FOR PUBLICATION, IT SHOULD NOT REPLACE THE EXPERTISE OF AN EXPERIENCED CRYSTALLOGRAPHIC REFEREE.

No syntax errors found.      CIF dictionary      Interpreting this report

## Datablock: mj\_305

---

|                        |                                            |                                      |              |
|------------------------|--------------------------------------------|--------------------------------------|--------------|
| Bond precision:        | C-C = 0.0028 A                             | Wavelength=0.71073                   |              |
| Cell:                  | a=16.7366(5)                               | b=14.4586(3)                         | c=31.8111(6) |
|                        | alpha=90                                   | beta=93.707(2)                       | gamma=90     |
| Temperature:           | 293 K                                      |                                      |              |
|                        | Calculated                                 | Reported                             |              |
| Volume                 | 7681.8(3)                                  | 7681.8(3)                            |              |
| Space group            | P 21/n                                     | P 1 21/n 1                           |              |
| Hall group             | -P 2yn                                     | -P 2yn                               |              |
| Moiety formula         | C59 H63 N7 O, C32 H34 N2<br>O2 [+ solvent] | 4(C32 H34 N2 O2), 4(C59<br>H63 N7 O) |              |
| Sum formula            | C91 H97 N9 O3 [+ solvent]                  | C364 H388 N36 O12                    |              |
| Mr                     | 1364.78                                    | 5459.36                              |              |
| Dx, g cm <sup>-3</sup> | 1.180                                      | 1.180                                |              |
| Z                      | 4                                          | 1                                    |              |
| Mu (mm <sup>-1</sup> ) | 0.072                                      | 0.069                                |              |
| F000                   | 2920.0                                     | 2533.0                               |              |
| F000'                  | 2921.04                                    |                                      |              |
| h,k,lmax               | 24,21,46                                   | 22,20,44                             |              |
| Nref                   | 24753                                      | 20856                                |              |
| Tmin,Tmax              | 0.998,0.999                                | 0.671,1.000                          |              |
| Tmin'                  | 0.988                                      |                                      |              |

Correction method= # Reported T Limits: Tmin=0.671 Tmax=1.000  
AbsCorr = MULTI-SCAN

Data completeness= 0.843      Theta(max)= 31.130

R(reflections)= 0.0624( 12665)      wR2(reflections)= 0.1773( 20856)

S = 1.036      Npar= 940

---

The following ALERTS were generated. Each ALERT has the format

**test-name\_ALERT\_alert-type\_alert-level.**

Click on the hyperlinks for more details of the test.

---

**Alert level B**

PLAT230\_ALERT\_2\_B Hirshfeld Test Diff for C02M --C02P . 7.3 s.u.

**Author Response: Differences in the components of the anisotropic displacement paramete**

---

**Alert level C**

ABSMU01\_ALERT\_1\_C The ratio of given/expected absorption coefficient lies outside the range 0.99 <> 1.01

Calculated value of mu = 0.072

Value of mu given = 0.069

PLAT220\_ALERT\_2\_C NonSolvent Resd 1 C Ueq(max)/Ueq(min) Range 3.6 Ratio

PLAT222\_ALERT\_3\_C NonSolvent Resd 1 H Uiso(max)/Uiso(min) Range 4.4 Ratio

PLAT230\_ALERT\_2\_C Hirshfeld Test Diff for C01Q --C02Q . 5.3 s.u.

**Author Response: Differences in the components of the anisotropic displacement paramete**

PLAT230\_ALERT\_2\_C Hirshfeld Test Diff for C020 --C02P . 6.6 s.u.

**Author Response: Differences in the components of the anisotropic displacement paramete**

---

**Alert level G**

PLAT013\_ALERT\_1\_G N.O.K. \_shelx\_hkl\_checksum Found in CIF ..... Please Check

PLAT042\_ALERT\_1\_G Calc. and Reported MoietyFormula Strings Differ Please Check

PLAT045\_ALERT\_1\_G Calculated and Reported Z Differ by a Factor ... 4.00 Check

PLAT068\_ALERT\_1\_G Reported F000 Differs from Calcd (or Missing)... Please Check

PLAT199\_ALERT\_1\_G Reported \_cell\_measurement\_temperature ..... (K) 293 Check

PLAT200\_ALERT\_1\_G Reported \_diffrn\_ambient\_temperature ..... (K) 293 Check

PLAT605\_ALERT\_4\_G Largest Solvent Accessible VOID in the Structure 84 A\*\*3

PLAT720\_ALERT\_4\_G Number of Unusual/Non-Standard Labels ..... 199 Note

PLAT802\_ALERT\_4\_G CIF Input Record(s) with more than 80 Characters 1 Info

PLAT941\_ALERT\_3\_G Average HKL Measurement Multiplicity ..... 3.7 Low

PLAT950\_ALERT\_5\_G Calculated (ThMax) and CIF-Reported Hmax Differ 2 Units

PLAT952\_ALERT\_5\_G Calculated (ThMax) and CIF-Reported Lmax Differ 2 Units

- 
- 0 **ALERT level A** = Most likely a serious problem - resolve or explain
  - 1 **ALERT level B** = A potentially serious problem, consider carefully
  - 5 **ALERT level C** = Check. Ensure it is not caused by an omission or oversight
  - 12 **ALERT level G** = General information/check it is not something unexpected

7 ALERT type 1 CIF construction/syntax error, inconsistent or missing data

4 ALERT type 2 Indicator that the structure model may be wrong or deficient  
2 ALERT type 3 Indicator that the structure quality may be low  
3 ALERT type 4 Improvement, methodology, query or suggestion  
2 ALERT type 5 Informative message, check

---

## Validation response form

Please find below a validation response form (VRF) that can be filled in and pasted into your CIF.

```
# start Validation Reply Form
_vrf_ABSMU01_mj_305
;
PROBLEM: The ratio of given/expected absorption coefficient lies
RESPONSE: ...
;
_vrf_PLAT220_mj_305
;
PROBLEM: NonSolvent   Resd 1   C   Ueq(max)/Ueq(min) Range           3.6 Ratio
RESPONSE: ...
;
_vrf_PLAT222_mj_305
;
PROBLEM: NonSolvent Resd 1   H   Uiso(max)/Uiso(min) Range           4.4 Ratio
RESPONSE: ...
;
# end Validation Reply Form
```

---

It is advisable to attempt to resolve as many as possible of the alerts in all categories. Often the minor alerts point to easily fixed oversights, errors and omissions in your CIF or refinement strategy, so attention to these fine details can be worthwhile. In order to resolve some of the more serious problems it may be necessary to carry out additional measurements or structure refinements. However, the purpose of your study may justify the reported deviations and the more serious of these should normally be commented upon in the discussion or experimental section of a paper or in the "special\_details" fields of the CIF. checkCIF was carefully designed to identify outliers and unusual parameters, but every test has its limitations and alerts that are not important in a particular case may appear. Conversely, the absence of alerts does not guarantee there are no aspects of the results needing attention. It is up to the individual to critically assess their own results and, if necessary, seek expert advice.

## Publication of your CIF in IUCr journals

A basic structural check has been run on your CIF. These basic checks will be run on all CIFs submitted for publication in IUCr journals (*Acta Crystallographica*, *Journal of Applied Crystallography*, *Journal of Synchrotron Radiation*); however, if you intend to submit to *Acta Crystallographica Section C* or *E* or *IUCrData*, you should make sure that full publication checks are run on the final version of your CIF prior to submission.

## Publication of your CIF in other journals

Please refer to the *Notes for Authors* of the relevant journal for any special instructions relating to CIF submission.

PLATON version of 05/12/2020; check.def file version of 05/12/2020

Datablock mj\_305 - ellipsoid plot

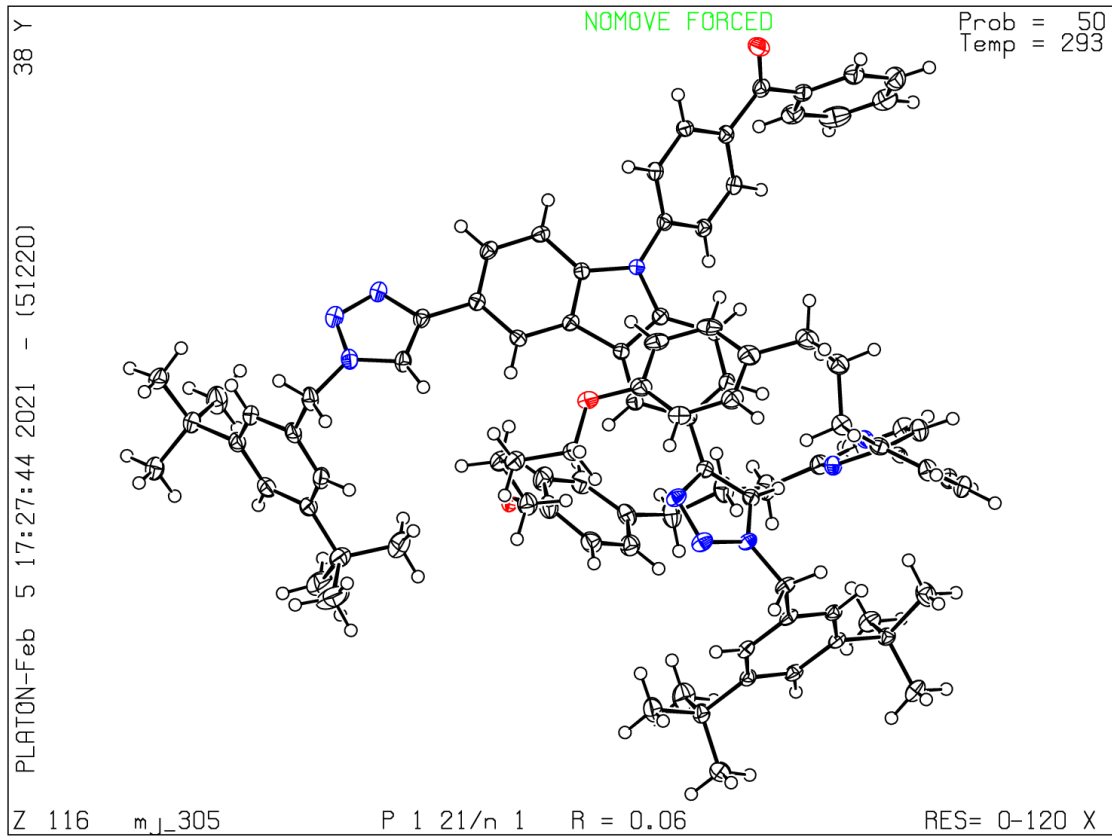

Supplement: ANIE-60-12066-s005.pdf [file ANIE-60-12066-s005.pdf]
